# Supplementary material
Source: publisher figshare collection journal article supplement (https://brill.figshare.com/articles/dataset/_/20200514)
Supplement: Supplementary file 1 [file 2]

بِسْمِ اللَّهِ الرَّحْمَنِ الرَّحِيمِ

هَآءِ زَاوَا شُوتُ

بِسْمِ اللَّهِ لَطِيفُ كَوَائِنَ لَابِ تَكْفُ

نَا نَدَ كَيْصِفُ يَا رَبِّ نَ تَمِرِيَا

نَ تَمِيرِيَا تَمُ رَبِّ نَلِيُو عَزِمُ

نَ الْبَزْ وَفَقَمُ وَتَخَاءُ كُسَحِيَا

شَبَاهُ نَ كَنَعُ لَنَعُ نَتَاكَ تَسَعُ أَسْعُ

أَسَا أُرُو يَسْعُ كُو نَيْ مَوْضُوعِ هَايَا

فَتَحَايُو كَيْتَابِي نَ مَا مَبِ كُحْسُ وَانَ

كُحْسُ وَالْوُ وَانُونُ هَاكَ زَاءُ زَشَارِيَا

هَآءِ زَاوَا لُ وَانُونُ نَ كُو مَنُوسُوتُ

زَهِيُونَ أَرَتُ كَوَادِنَ كَنُونِ بِيَا

نَامِ تَاتِي مَكَارُ كَزَيْتِ هَاكَ هِرُ

كُو نَيْ شَارِيَا مَبَارُ مَوْلَ أَمُوپَا نَقِيَا

تَارُ زُ نَعْمَزْ هَاكَ الْبَزْ وَفَقَمُ خَلَا لَكِ

هَآءُ وَانَ مَخْلُوكِ كُو نَيْ حَدِيثِ نَ أَيَا

حَدِيثِ يَسُورَ رَانِدَكَ آيِي يَسُورِ تَامَدُ

مَوَانَعُ وَآكَ مَحَدُ نَدُ وَ تَا أُمْلِيَا

أُحْسِلَامُ دِن دِن مَنُورَا نَا يُوتَمِن  
وَان تَانَعُ مَا تَوَمَبُون بِل قَبَل كُنْجِيَا  
نِهَاك يَا آلُو مُوَان كَمِب مَام مَفَان

أَلِيُو مُزِر مَن سَحُوا سُور كُوا طَلِيَا  
قَبَل يَا كَا مُو نَاب وَكُمُو وَ  
أِيك أَحْيَا كُو مَام مَو كُوا نَحَالِيَا

ن لَزِمَ أَفْجِر مَامِب يَا تَا حَاء جِر  
كُو تَنَك تَهَار وَا ن أَكُو يَا تِيَا  
فَجِر أَوَازَمُو كَمَس مَام وَا وَا ن

أَسُو وَاك مَكُون كَزَان أَتَانِيَا  
أَسْتَبِب كَزَان كُوا كَبَسُو مَوْنَدَان  
أَلُو كُنْجِي مَا تَوْن مَو يُو وَا كُو كُنْجِيَا

مَام مَنُون مَحْمُ كَاتَاك مَام أَلُو تَم  
وَا نَا وَ سَكَلَمُ مَامِب تَكَا يُو وَا لِيَا  
مَنَسُو مَام بُور سَحُوا كِبَل ن سُور  
بِل ن كُوا نَجَم سِر مَو نِب دِن نَاتَا يِيَا

|                             |                             |
|-----------------------------|-----------------------------|
| وَاب مَامَ وَفَخَارِ        | مُونِي مَابِرْمَارِ         |
| نَوَادَا وَافْخِرِ          | كُوا مَامَ كِيْفَنِيَا      |
| سَوَاب مَامَ مَتَانَعْ      | نَ مُونِي طَبِيَا جُونَعْ   |
| هُوِيُو تَارِيْبَانَعْ      | يَا مِلِلْ كُسَالِيَا       |
| وَاب مَامَ مَتَلَقْ         | أَسِيُو هُنِيْبَقْ          |
| مِيُونِ أَلُوْمُورِقْ       | سِمَامَ وَكُئِيَا           |
| أَلُو كُو مَا أَعِلْ        | أَسُو مَنَعْ مَشْمُولْ      |
| تَوْتَنَعْ كُولْ كُولْ      | وَانْ كُو أُنْقَلِيَا       |
| نَ بُوْرَ كَوْمِشُوْمَ      | وَالْ سَامِبِ نَ لِرَمَ     |
| كُوَانِ أَلُوْسُوْمَ مَامَ  | نَ مَنَعْ يَاتَامُو لِيَا   |
| مَامَ أَكُوْجِبِكْ          | نَ وَاْنْ هُنْفِيْعْ        |
| نَ مَامِبِ مَنَعْ هُنِيُولْ | يَا كَانْدَامَ سَاوَنْدِيَا |
| كُوَانِ مَامَ نَ مَوَالِمَ  | وَكُوَانْدَ مَنُوْمِمْ      |
| أَثَرِيْبَانْدَا كُدُمَ     | كُوا وَكَأَوْ هُسَلِيَا     |
| كُوْتَا أَثَارِ نَجَمَ      | أَتَا سَلِيْ دَرِيْمَ       |
| نَا بِيْ مَبُوْقْ أَلَمَ    | هَآيُو نَدَاكْ هُبِكِيَا    |



|                            |                                 |
|----------------------------|---------------------------------|
| نِ مِيَا فَا نِي كَارِفُ   | يَا مَامَ كُوَا رِفُ            |
| مَامَ كُو مُو نَغْفُ       | هُو نَغُوكَ نَ ذَرِيَا          |
| يَا يِل هَاك يَامُوَا نَ   | كَزَا رَ هِنْدُ كُوَا نِ        |
| بِنْتِ اَوُ كَبَان         | لَاك لَكُ كُسِدِيَا             |
| نَ هَا نِدُ كُو لُو لُو تِ | نِ هَك يَاك اِيَا تِ            |
| نِ كَامَ وِ نِدُ وُتِ      | اَ مِبَالُو تَا خَرَجِيَا       |
| سِمُوَا نِدُك نِ اَقُ      | كُوَا لِك اَتَا كُو كُفُ        |
| نِ يَامُو يُو كَا اِمُفُ   | سِدُ رُتِ تَا سِي كِيَا         |
| مِيَتِ نِ لِلُو زِرِ       | كُوَا وِ نِدُ اِثْفَخِرِ        |
| كِيَتُوَا اَوُ هَا جِرِ    | بِلِ هِلِيَرِ مِيَا             |
| نِ هَاك كُمُوَا نِدُ كَشِ  | مُوَا نَ كُمُوَا رُ دِ شِ       |
| سِيُو تَا مُمَا نَغُ شِ    | سِيُو رِ زِ حَا دِيَا           |
| نِ هَاك كُمُ سَجِلِ        | رَسِمِ كُوَا سِرِ كَالِ         |
| وُ نَوَاك نَا وُقِلِ       | نِ هَاك كُوَا وُتِ يِيَا        |
| هَلِ يَامُتِ نِ مُمُ       | كُوَا وُتِ وُتِ فُ هُمُ         |
| نَا وُ اِ سِيُو نِ وُمُ    | مُوَا نَا اُ كُمُوَا نِدُ كِيَا |



مَوَا نِدْ كِي كَر تَايسِ مَوَا نُو كَزَاو اُيسِ

اُيسِيُو تَز تَقَايسِ كَس اُ تَا تِيْتِيَا

كُشُوا نِدْ ك هَرَك هَات مَوَا تَا تَكُوك

ن مَنُو اُ تَا سُمُبَك بَا دَا اُ حُر نَقِيَا

ن هَاك كُل مَوَانَات كَزَاو كِيُو حِت

كَا ص كُوَاوَت وَكَات ن دَا رُر مَامُب هَا يَا

ن هَاك يَاك كُيُنْدُوا ن كُوَا مَپِنْد كُيُنْدُوا

وَرَا ز و نَغ هُشْدُوا هَا ي كُو تِيْمَر يَا

وَا ن وَ هِتَاج هِل مَپِنْد يَا كُول كُول

مَپِنْد ن مَآكُول مَپِنْد هَتَا نَقَلِيَا

تُو تُو نِشَر رَحْم ن كُيُنْد دَرِيْم

كُوَا وُت يَاب نَامَاه وَا ن هِل هُر نَقِيَا

تُو اُ نِشَر اِمَان تُوَا مِب نَام كُوَا مَكِن

تُسِرُو و و نَدَان وَا ن وُت حُر كِيَا

وَا ن وَ كُوَا و نُون هِلُو هَا و پِنْد سَا ن

اَكُيُو هُون ن مَنُو مَو نِيَا

وَاِنْ وَكُزْنُكُمْ

وَكَانَ شَجَوِيًّا ز

وَأَن نَّاهٍ تَوَسِّدُ

وَأَنْ تَتَسَوَّيُوا

تَعَوُّوْ يُوْزِرْ جَانْ

ن ذ ر و و ك ن ي

ن ۱۴ ن و ت تیر

ما زو ی تیا لو م  
ا ا ا ا ا ا ا

نہایت

تَوَابٍ وَانْوَكَاتِ

فمن سامو كانت

نَوَافٍ وَأَنْ تَقَاسِي

میرزا علی قلی خان

تَرْيُوسُ وَانْ وَتْ

۱۰ نَعِ رِ نَعَالِ رِ تَوْدِ



تَنْخَا يَا نُونَ مَاتُوْتُ

يَا نَ نَدَانِ نَا أُكُوْتُ

أَ تَرْجِبِنِ مَرْتِ

هَآيُوْ نَدَاكِ هُيَالِيَا

وَانِ هَآيِ وَيَا تَادِ

بَسَاوَنِ وَآكُوْسَاوْ

هَوَ فَا نِ وَانِ هَاوْ

كُوَا يَنْدُ نَا كُوَا طِيَا

وَانِ هَآيِ وَكِيَا تِ

هَآوْ يَآ سِ مَاتَا تِ

أَجِلْ هُمَتِ مَتِ

يَمُوَا نِ هُيَالِيَا

مُوَا نِ هَآيِ أَكُوْسَايِ

كُسُوْرُ يَنْغِ هُوِيْ

وَانِ هِنْدُ مَا يُوِيُوْ

هَوَ نَدَامِ سَاوْ نَدِيَا

نَدِيُوْ وَوَايِ وَكُوْرِ

وَزَارِ وَكَآوْ أَكِرِ

يُوِيُوْ نَغْ مَا رِ كُوَا مَرِ

نِ هَاوْ يَنْدِ أُدِيَا

مُوَا نِ مَا يَنْدِ كُوْسِ

يَنْغِ مَتِ كُتُونُوْسِ

أَكُوْ كُوْ كِيَسِ

أَتَا سُونُوْ يَلَا غَايَا

أَتَا شِنْكَ مَنُوْ

كُكُوْ سِ مَا يَنْدِ مُوَا نُوْ

هَوْنِ وَ مَتِ مَنَانُوْ

زِدِ كُفِيَرِ يَا

مُوَا نِ كُتُوْ كُوْسِ مَوَاكُ

كِيَا تِ مَا يَنْدِ يَالَا

هُوَ هَسِبَا يَالَا

كُونِيْ مَوَاكُ كُتْلِيَا

كَا نُو كَات مَكَانِ هَسْتَعِر نِيْمِيَانِ

هَات پِشِپ وَنْدَانِ كَار هَزُو بِلَا يَا

هُوَ كَامَ اِبِلِسِ اَو كَامَ مَوَانِ خِيَسِ

رِ حِرِ كَلَوَاكِ هَزِيَسِ كِتْسِنْدَ هَانْدَ زِي پِيَا

هَائُو يُوْتِ نِ اَثَارِ يَا اَلُو يَات دِ شَارِ

يَا مَا كُوَسِ يَا لُو جِرِ مَدَو كِيُنِيَسِ يَا

بَايِسِ نَا تَشَهْدَ رِ تَوِي جُو نَ خَا شَوَارِ

وَ اَن تَسِپِ اَزُ رِ بِلَا كُو حِرِ پِيَا

نَ هَالِكِ نِيْنَقِيَن تَنِ اَلُو اَمُرَ رِ بِيَا نَ

نَ كُو لَ كُوَاوِتُ قَانِ كُنُوَا نَا كَشَا پِيَا

مَوَانِ اَكِسِدَ كَزَاوِ نِ هَالِكِ يَاكِ كِيُو

يَا كِشِبِشَتَ مَارِوِ كُوَا اَمُرِ يَا جَلِيَا

مَارِوِ هَا هِي يَا مَامَ <sup>مَوَانِ</sup> ~~كَلَامَ~~ كُنُوَا نِ لَزِمَ

يَا مَامَاكِ يَا كِيُو مَ يَا نَغُو مَبِ هَسَا عِدِ يَا

مَارِوِ يَا مَامَا يَاكِ نِ ذَا رُ رَ كُو كُوَاكِ

اَكِشِبِ كُوَا يُو يُو كِ هُو نَا نَجْمَ اَفِيَا



وَالْإِسْنِدُ كَمَيْ  
مَوَان مَارَو كَوَاتُوبِ  
دَ كَتَارِ هُرْتِ  
هَوَ پِنْدِ كُسَكَا  
تَبِ سَكُومَبْ كَزُرِ  
ئِن نَا نِينِجَ خَطَارِ  
مَوَان هِسْأُتِرِ  
تُوبِ أَحِيرُ وِ يَا  
نَ تُوْپِ هِسَابِشِ  
مَدَرِ نَا هُكَارِ شِ  
سِسْكَالِ كُيُوشِ  
بُرْشِ اُنْغَ شُمِيَا  
شَرْتِ كُيُوشِ  
نَا كَسِ كُيُكَأُ شِ  
مَوَان هُكِيَا شِ  
لِي اُنْكَ تِنْدَ هَا يَا  
تِن يَا مَامَا مَارَو  
أَمِيَا أَمْبَ مَوَلُو  
سَمُوتَ هَا يَا لُيُو  
نَ تِيَارِ كُشُمِيَا  
هِيَا نَ نِينِجَ هَدَارِ  
سِيرِ دِيَا كُجَرِ  
مَوَان هُكُوَا مَارِ  
يَا مَامَا اَكُشُمِيَا  
يَا مَوُ مَوَا كُوَا كِيمُ  
هَاجَ زَاكِ زَبْتِ زَمُ  
هَكُنَ جَسُو كُومُ  
مَدِنِ سَكَارِ پِيَا  
هَعْتَا جِ كِيَا اُنْدَ  
وَالِ كُدَارِ كُوَا خَا نْدَ  
يُو يُوْتِ اُنَا يُو كُونْدَ  
هَوَا وِ وِ يَامُو يَا

هُوَ نَدَانِ مَوَامَاتِ تِيَارِ كُلِّ وَكَاتِ

مَوَانِ تَابُ هَيَاتِ نَ مَا هَانِ أَذِيَا

كَيْسَهَاءُ هُوَ زِي وَالِ هَا يَا كُوبِ كَارِ

كَمُوَا حَزْ مِثْلِ زِي هُوَ يَا خَانْدَامِ نَدِيَا

وَلَهَيَاتِ غَرَامِ كُنُورِ سِلِزِمِ

نِيْمِ يَا كِ كَارِمِ وَانِ اَمُو دِيَا

يَا مِي كُوَانِ عَوَوَاسِ وَانِ اوتِ كُوَامِ مَسِي

كَبَلِ يَامِدِ كُو مَسِي كُوَا اُ رِمْبِ كُتَايِيَا

مَا مَا هُوَ ظَلَمُ وَانِ يَاسِ كُفَقَامُ

اَتِ اُجَانِ اُدُمُ يَاسِمِ كُسَالِيَا

مَوَانِ يِي كَذَلِكِ رِ هَاجِي كُمِيلِ

كُوَا تَارِيخِ كُتُوكُوكِ كِيْمِ كُذْنَعِ اِيَا

مِيدِ كَانِجِ اَيَاتِ نَ رَتَبِ اَفُوتِ

سِنْدَانِ مَوِي <sup>سَوَات</sup> ~~هَكَوَا~~ نِ مِهْمِ كُشْمِيَا

اُسِنْدَاءُ سِنْدَانِ زَارِ وِدَنِ مَكُونِ

يَجْنَعِ هَزْ كُوَامُوَانِ مَوِي لِ هَسَايِدِ يَا



مَوَانْ أُمْبِخَاكُولْ      نَ يَا لُوْ يِمْ كَلَالْ  
نَ هَا كِرْ كُوْاجُمْلْ      سِيسْ مَبْتَوَا كُوْتِسْنِدْ يَا  
وَابْ خَاخُولْ كَزُرْ      نَقُوْ زَا كُوْسِيْرْ  
وَايُوْ كُوْوَنُوْرْ      اَلِيْنْدْ يَا ءَ اَفِيَا  
وَانْ كُلْ وَهْتَاچْ      نَ يَا كُنْزَا سَايْ مَاجْ  
اَفِيَا بُورْ هِيْجْ      اَلَا كُوْا كُنْزْ نَقِيَا  
سِشْرْتْ كُوْغَالْ      يَا اَفِيَا مَآ كُوْلْ  
مِهْتَاچْ يَامُوْلْ      نَدِ يُوْ يَا كِرْ نَقِيَا  
وَابْ هَا تُوْنْدَنْ مَبُوْغْ      پِيْ رَمْبْ وَكُشَاغْ  
كُكْ مِيَا كُتَاغْ      وَاَنْ نَ وَاپَاتْ پِيَا  
نِيَا اَحُوْرْ كَانْ سَمَاكْ      نَ بُورْ سَانْ  
هِيَا نَصَهْ رَجَانْ      زَتْ هِيْزْ جِيْمِيَا  
نَالُوْ زُوْ وَسِكُوْسِيْ      وَاَلْ مَنُوْ سِنُوْ كُوْوَسِيْ  
ئِلْ نَافُوْ يَسِيْ      يَا نَقَانْ اَحَايُوْ نِيَا  
كُكْ كُوْسِيْ نِلْزَمْ      زُوْ لِسْلُوْ لَامَا  
كُوْانْ نَدِ يُوْ اُسْلَامْ      نَ كَانُوْ نَ زَا اَفِيَا

نَ مَنْوُ لِكِنُوكُوتَ فِيدَايَ هُتُوپَاتَ  
مُوتَ لِكِسَ كُوهَاتَ يُو كُوتَ هُويَا  
مَاءَ سَانِ رَاهِمُ كُوهَا سِيسِ وَانِ اَدَمُ  
سِيسُ مَنْوَيَا هُ يَالُو صَافِ اَنْقَلِيَا  
وَانِ وَاپَ مَاءِ صَافِ قَالَ سَامِبُ مَنْوَنِ سِفِ  
نَاهُ هُوهَا مَاءِ غَافِ نِيَاكَ تُولُكَ نِيَاكَ هُنُقِيَا  
يُو وَانِ نِزْدِفُ شَمِبُ رَاعُ رِ كَفِيفُ  
مَاءِ يَا كُوهَا كَافُ مَارَ هُزُ وَ بَلَا يَا  
نَ اُكَاكَ سِيسُوتُوتَ كُوتَا اَنَ كُوهَا مَاتِ  
كُوتَ رِ لُو لُورِ تُوتَ كُوهَا رِ مَرْدِ هِنِيَا  
رِ تُوتَ مَنْوَرِ بُو مِوِ اُكِتِكَ كُوهَا كُوهَا مِبِ  
هُزِ يُونِ نَارِ كُومِبِ رِ مُوتَ تِلَ هُتُويَا  
هُزِ مَنْوَرِ خَنَارِ وَتَ سَانِ هُمَسِرِ  
شَرِتَ كُنْهَذَارِ مَارَ هُكُشَا مِئَلِيَا  
مَرْدِ يَا كُومِصِبُ مَوَانِ يَانْغَا وَ هُتِبِ  
فَنِي كُلَ تَرْتِبُ يَسِبِ دَاو كُتَا يِيَا



أَوْ يَسْأَلُ دُرَّاءُ مَثْوًى هُوَ مَكُونُ

أَكُونُ وَ يَكُونُ نَ زَنَا كَارِ كَا يَا

نَ مَوَانُ كَوْهَعَارُ مَيْتِ مَاءِ كُلِّ مَاءِ

~~مَيْتِ مَاءِ كُلِّ مَاءِ~~ أَنْ حَاوَزَ لَزْبُورُ سِخْلُو كَزِ نَقِيَا

هَاتِ كَامَ هَيْدَ مَيْتِ مَاءِ كَزِ لَلِ

يَا نَقَا وَ مَنَعَهُ هُنُوكَ مَخَاكُ يَا نَسَالِيَا

مَاءِ يَا كَوَكَتِ مَوْلِي نَ مَوْتِ

يَلَا يَامَاءِ هُجَتِ مَدَ مَرْفُ سَحِيَا

وَأَن كَيُولِيْلِمُ نَ هَالِكُ كُوْ فُهِمُ

يَلِمُ نَغْرَمُهُمُ كَوَاوَانُ وَ أَرَمِيَا

يَلِمُ كَتُ ذُرُّ كَوَا جَامِ زَاكِ سُورُ

يَلِمُ أَكْبَ بُوْرُ يَامَوَانُ كُمُو تِيَا

وَأَن لَزِمَ وَسُومُ مَارِفَ وَيَا تُمُ

وَيَزِ تَغَانِي شِمُ يَلِمُ كُوْ يَا تِيَا

وَأَن تَوَسُّوْ مَشِي أُوْنَعُ تَيُّوْ تَشِي

وَأَن تِسْمَامِيْنِ كُوْ عَزَ سَاوْ نَدِيَا

وَاللَّهُمَّ صَلِّ وَسَلِّمْ وَارْحَمْنَا

تُسَوِّفُنِي مَا يَت

وَأَنْ تَسْمَعُوا دِينَ

وَكَيْسًا ۚ وَنِقَانَ

هَلُو رِ كُوْجُم

نَا مُنْعَ نَاهُكُمْ

عَالَمُ رَاكِبِي

وَاوَزَكُنْدَرُشَا

تَوَاسُّوْا مِشْرُكُوْهُ

ن ا د ء ا ج

١٩ جملہ کا طار

هَاتِ اَحِلْ هُوْدَارِ

تَوَافِدُ زَاكُوْنَ

مُسْتَمِينٌ نَبِيٌّ

وَأَن وَكِيلًا

هو نبي بالاسلام

عَلَيْهِمْ سَلَامٌ

عَلَيْهِ تَوَكَّلْ يَا

نَ مَسِيحِ قُرْآنِ

دین انا توفو نیا

وَرَارِ تَلْفَهَامُ

شکو خبی دیریا

لِزَمَ كَوْفُورٌ شَرِي

La Louis's

تُسَوِّبُنِي عَالِ

تَاجِرِ يَاسُوِيَا

كُؤْمُوْا لِكِ شَارٍ

كُوا۟ وَرِثُو۟ا۟ هٰٓؤُلَآءِ

كَارِزِ بْنِ مُعَمَّرٍ هُنُو

وَرُوِيَ كُنْهًا

نَفُوْهُيُوْهُكَ

نَ كُوْتُ هُسِكِلِيَا



تو بین ما کو اند ما سو مون می کو ند  
و کسو م نند نند و کسای هیو تیا  
فیدر ها توتو آن الا و کسو م سان  
و ند مبال و ت و ان شر ق ن غر بیا  
گوئی هر زت زام هئ مینو ا م  
الا کو و امسو ز ند کیند کیا  
علم هیا سامی ند یو هو نقو نیاسی  
ند یو خاند کامیسی هفتو رت ند یا  
هل نخلی جیا رن رن رن رن رن  
نت یبغ ارنخون مات هیو همز یا  
و لیات کو ا یور ن کو ا فند و کار  
علم هرن هر جتا ماب و لیز نخیا  
نت ز لو تاجر ن ز پ هل فیدر  
ن ز ل ز لو تاور کو ا علم کو ند لیا  
ن لنگن نامب ساس سهاک ن سها کو م  
و لو و ان کو تسی نغم کار کو تیا

وَأَنْ تَسْلِمَ مِثْقَلِ

وَأَنْ تَسْوَئِلُ

وَإِنْ وَتَيْكَ وَكَاتِ

کُو کَا زَ کَامِ نَاتِ

کُوَاپِ کَارِ نَزتِ

رَكُوا قَسَاءَ يَأْخُزُو

وَالنَّاسِمْ مَا كُوْنُ

سِرِّوَا تَمَّایَسِرِ

هوان ييب هر سي

کَمِثْلِهِ كَوْنُ كَيْفَا مِ

کارِ را گواہی بخوار

اَكْمَلْتُ دُكَّانَ

كَارِ كَوَاتَانِي

هَنُورِ كِلِخَانِي

مِثْلًا نَقِي كَوَا وَكَاتِ

نَتَيْنِ اَوْ هَوْتِ



باجي رَ كُتُونُوكَ      ز ياز رَ كُتُونُوكَ  
ا و مَو نَدُ كُتُونُوكَ      سَمَز رَ ي كُتُونُوكَ  
سَمُوا مَبِي نَدُ زَاكُو      سَتَاك مَ ا نُونُوكُو  
رَ رَ كُتُونُوكَ اُنُونُوكَاكُو      يَسَ اُجَنُونُوكَا  
هُوَ ا مَمُو ا كَزَانِ      مَوَان ا نَ نُونُوكَا  
يَا كِيَا تِي كَا يِنِ      كَا يِ هُكُتُونُوكَا  
مَو نِي كُتُونُوكَا رَ رَ      كِي كُتُونُوكَا ا مَمُو  
ا نَدُ يَوَانِ كَاتُونُوكَا      دِنِ يَاكُ كُتُونُوكَا  
هُوَ مَمُونُوكَا      هُو يُو مَوَانِ مَسَكِنِ  
هُيَا مَتَبِ نَدِيَانِ      هِيَا مَوَا مَبِي يُونُوكَا  
مَوَانِ كُتُونُوكَا لَاجُونُوكَا      كُرُ دِ رَ كُتُونُوكَا  
سَمَز رَ كُتُونُوكَا لَاجُونُوكَا      نَ مَ ا كُونُوكَا كُتُونُوكَا  
هَاتِ ا كُتُونُوكَا      سَبَرِ مَنُونُوكَا  
مَكُونِ نَ سَو هَدَا      كَلُو مَبِي كُتُونُوكَا  
مَوَانِ ا نَامُ خَسِرِ      ا مَبِي نَ دُ تَارِ  
نَ مِلَلِ نَ دَهَارِ      نَارِ ا نُونُوكَا

مَوَانْ اَدَبْ مَفْنَدِ      كَتَا نَقْمَانْ وَ نَدِ  
 وَتْ وَتْ اَوِيْنَدِ      نْ كَوَصِفِي نِيَا  
 مَفْنَدِ كَتَا نَقْمَانْ      نْ وَ كُونْ وَانُونْ  
 اَتَنِيْغْ كَمُونْ      سِنَاهْ هُمُونْدِ لِيَا  
 اَيُوْكَنْ مِيَاكْ      هَا يَفَاءْ كُيْرَاكْ  
 كَوَا اَمْرِيَارْ بَكْ      نْ كَوَا مِلْ نْ شَارِيَا  
 مَفْنَدِ مَوَانْ مَفْنَدِ      يَالُوْ مَمْ اِيَا تَنَدِ  
 مَبُوْ نَجْمْ اَزِيَا نَدِ      تَا نِيْغْ اَكِيْمَنِيَا  
 مَفْنَدِ شِيْ كَوَا زِيْنَدِ      كَوَا تَلُوْ مَزِيْ مُونَدِ  
 مَا نِيْوْ يَسُوْكَانْدِ      يَسَدِ سَا مَبَامْبِ يَامُوْ يَا  
 مَا نِيْوْ نِيَاكْ خَالِ      يَا نَدَا مَانْ مَوِلْ  
 يِيْ سِيْمُوْ يِيْ هِلْ      وَ وَا كَا لِيَا نَدِ لِيَا  
 كَوَا هَا يَانُوْ فَنَانْ      بَا يِيْ هِيَا نْ مَا نْ  
 مَا نِيْوْ اَنْغِيَانِيْ      يَا نَقَارِ يَا تَا چُوْ يِيَا  
 هِيَا نُوْ وَاتْ اَتِرْ      كَوَا مَوَانْ تَلُوْ مَزِيْ  
 يِلْ اَتَا كُوْ خِرْ      هَا يُوْ كَتُوْ مَتَا نِيَا



سِفَتِ هِنَ لِرْمَه  
 كَوَا كِلْ مَفَنْدَرِمَم  
 اَو بَاب اَو مَام  
 مَوَالِمُ هَكَارَنِيَا  
 رِ جَانِ وَا نَ اَحِل  
 نَ مَا مَبْ هُنَا مِل  
 وَانِ رِ يَمَزْ كَال  
 زَوَاتْ كَوِيْمِيَا  
 وَ نَارْ زَادْ مِرَانِ  
 رَكْمِيُو فُلَانِ  
 هُئُونْدَ تَشَانْدِيَانِ  
 اَو حَوْلِ هُئُونْمِيَا  
 هَاكِ نَ مِرَزِ نِي  
 نَدَاوَتِ وَالْوَزِ جَانِ  
 اَو مُم اَو مَوَانِ  
 نَ هَا كِي كَوَا شَرِيَا  
 اَو مُم اَو مَلِكِ  
 هَاكِ هُوِيِي نَدَاكِ  
 تَوَابِ تَسَوَايُولِكِ  
 وَ نِيُو خُفَرِ حِيَا  
 نِلُو تَايِ كَوَا بِيَا نِ  
 نَدِرْ مَا رُفْ سَانِ  
 كُونِ نَا نِيْعَن نِي  
 نِيْدَ كِرْ شَرِيَا  
 كُنْ مَا مَبْ مَا لَمْ  
 مِرَارْ كِيْفَ هَا مِ  
 هُنُو هَايُونْ مِهْمِ  
 سَانِ هُمْسِيْدِيَا  
 مَرَفِكِ كَوِيُو  
 وَ مَوَانِ كَوِ نَا مَبُو  
 هِلْ يَامَبْ لِمِيُو  
 اَمِهْمِ نَامَبْ مَوِيَا

مَرْفِكَ هَارِثُ  
 رَفِكَ عَائِلُ وَزُرِ  
 رَفِكَ كَوَوَاتُ  
 أُمُيُوسِيكُوَانَقُ  
 يَأْسُومِمُ هَمْفُ  
 نَكْسِي كُئِمَزَانْدُ  
 وَمَوَانَاءُ مَصْحَبُ  
 أَرْيُوتَرْتُ  
 أُحْزِيُونُ شَجْمُ  
 قَبْلُ هِيَا زُ أُمُ  
 مَوِي مَوَانُ كَنَاكُ  
 كَوَا مَنَامُ مَا تَامَكُ  
 نَ وَالْجُوسُوكُ  
 مَرْفِكَ أَسْشِكُ  
 مَرْفِكَ نَ لَارِمُ  
 قَارُ نَغِي وَالْوَهْمُ  
 كَوَاوَمُ أَوُكُوَانَشَارُ  
 هُمُيُ أُنُتَوَا طَبِيَا  
 غَسِي كُلُّ أَوُورِقُ  
 كَوَا بَصَارُ كُتُمِيَا  
 نَ مَزِيرَهِيَا قَنَدُ  
 نَدَلُ لِنَالُوسَالِيَا  
 كَوَا نَوَاءُ كَرِبُ  
 طَبِي نَانِينْدُ يَسَا  
 مَوِي مَوَانُ سَلَامُ  
 زَانْدُ كَوَا كُئِيِيَا  
 أُمُيُ شُورُ لَالُ  
 أُمُوكُزُ يَانْدُ يَا  
 مَنَاحِيهِ أَعْيُوكُ  
 وَانِينْدُ زَاكِيُوتِيَا  
 كَوَا عُمَرُ مَالُمُ  
 تَيَاتُ يَأْيُوسُ يَا



مَتُّ هُمَّاجِ وَتُ      هِلْ نِدْ لُوْ أُمْبِلُ  
 مِتْ أُمْبِ مَوْلِدُتْ      يَنْكُؤُ نَغْ مِتْشِيَا  
 هُنْوُ حِي كُوَانْدِرْ      سَعْلِبُ كُلْ مَا رْ  
 مَتُّ وَتْ هُمَّجِرْ      يَشِبْ وَتْ هُكْمِيَا  
 نِ كَاسُورْ مَالْمُ      تَسَارْ وَانْ أَدْمُ  
 نْ كَوَاوْ نَغْنِ هَدْمُ      زِ كَاوَرِ مَارْ وِ يَا  
 مَرْفِكْ وَانْ أُنْوَا      هُكْنُغِيَا كَامْ مَشْوَا  
 مَارْ نْ وِ وُ هُكْنُوَا      شِمُورِ مِسْبُكِيَا  
 نْ مَرْفِكْ بَارْ      وِ نِي نِيْدُرْ رَا كُأْ زِ  
 أُنْوَا كَامْ وَمَرْدُ      هُكْيَا لَسْ مَارْ مُوْ يَا

مَوْنِي أْفِي مَتْوَامْ      يَا وَا وِ أُمْتِي  
 وَنَغْلِي نَا كَوَا      أْفِي نَا وِ أَرْتِيَا  
 أُنْأُونْ بِلَاشَاكْ      مَرَادْ يَا نَا مَشْدُ  
 أْفِي هَا نُسُونُوكْ      نْ وَا وِ كُوَا نَغْيَا  
 بَابِ هِنْدِيُوْ كَالِ      يَا مَرْفِكْ يَا رَطْلُ  
 أَلُوْ مَوْمْ هَبْدِلْ      وَ كَاوَرِ نِ خَالِ مُوْ يَا

|                               |                                |
|-------------------------------|--------------------------------|
| نَ مَا نَعْنِ يَا كَسَا سَ    | يَا هِر بُو كِسِر              |
| نَ زَ خَا يَ زَا نَا سَ       | مِئِن زَ مِز نَقِيَا           |
| خَصُوصَا هَا يَ مَدِشَ        | هَفُجَ هَا يَا يَا كَشِر       |
| يَا نَقِيَا يَ هَا يَا بَشِ   | هَفُورَ زَ مَوِي كُوَا مَوِيَا |
| مَدِشَ نَ مَتَا مَبِ          | هَقْدَ مَارُ زَ مَامَبِ        |
| نَ زَ رِي يَا أَلَمَبِ        | هَكُنَا سَ مَر مَوِيَا         |
| نَ زَ تَ هَا يَ هُونْدَشِ     | مَأْفُ هَا مِرِ شِ             |
| نِئِدَ مَوُوقَ هَقْدَشِ       | نَ هُو نَزَ بِلَا يَا          |
| مَدِشَ مَامَبِ هَفُوجَ        | يَا لُو مَم مَوُوجَ مَوُوجَ    |
| اِيُو كُو مَوُوجَا حَ         | وَا نَ كُو تِئِيلِيَا          |
| اِمَكُو نَ دَرُ زَ            | كُشَعُو كُوَا بَصَارَ          |
| نَا زَ پَسِنْدِ عَا نَ يُوَرُ | زَ فِئِدَ كُوَا نَقْلِيَا      |
| كُنَ بَا زَ رِخَا جَ          | نَا زَ زَ رِ تَسِيرَ لَ        |
| زِيُوُوقَ تَسُو لَ لَ         | وَا نَ كَزَ شَهْدِ يَا         |
| مَدِشَ يَا نَ مَا لَنَغِ      | كُو نَ طَبِي جُو نَغِ          |
| كَزَ نَزَ كُوَا مِيَا نَغِ    | زَ تَا يَا كَا ءَ دُ نِيَا     |



نَا نَبْدُ زَا الْكِنْسِ

زَسُو غَانَان ن سِی

ز مَشِی اُ پِی

ن مَدِش نَدِیُو نَدِیا

ن مَدِش هُو کَز

وَت کُو نِی یَا کُسُو ز

نَا نَبْدُ مَنُوقُ هُفَز

نَا کُو نَدِش یَا حَا یَا

هُکِت بَاب نَامَا

ن وَان وَ کِزَامَا

مَامَب هَات کِیَا سَم

کُوَا کِکُوت ن هَاتِیَا

هُفُفُ نَدِش مَخَاف

مِنَع یَا ا هَارِیْف

وَزَنَع هُتَصِرِف

کَام اُنَع کِز یَا

ا نَغَالِیَان مَقَار

یَا قُوَا ا سِک هِر

ن سَاوَن کُو نَدِوَار

ن وَت هُشَا نَغَلِیَا

یَا وَا سُو هَا ی مَشُون

کِنْدُ زَسُو نَا مِکُون

وَار مَبَاق ن زَنُت

هَذِرَان هُتَمَبِیَا

هِر ن زَا کِ اَثَر

مَدِش یَا ن خَطَا

وَرَار ن تَسِکِر

وَان یُوت کُوَا نَغَلِیَا

ز تَاب ن مَا عَا زِت

تَشِرِت تَشِرِیْفِت

وَسِیُو نَز وَا کَات

وَان کُوَا کُسُو م هَا یَا

|                             |                             |
|-----------------------------|-----------------------------|
| کُنْ مَنَعٌ سِدْ هِزْ       | مَا جَرْدَ يَا أُيُورْ      |
| کُوَا هَايُو مَوَانْ هُوْرْ | کِبَاتْ فِئْدَ مَوْرِ يَا   |
| زِ تَابْ زَا لِنِی          | زِ تِلْ یَا سِ کِیَا سِ     |
| رِ قَا یِ زِ جِیُو لِسِ     | نَ زَا نَغُوْنْ مِیَا       |
| هَایِ یُوْتْ کُوَا زِ جَانْ | مَا مَبْ هِیَانْ مَا نْ     |
| هَیُو تَرِ مَوْنُغْ سَانْ   | وَ کَاتِ نَ پَسِ پِیَا      |
| مَوَا نَاءْ مِیَلِیْزْ      | اُ مَفْهَامْ نِیْنْدَرْ     |
| یَالُو سَاوْ اُمُوکْزْ      | نَ صَا حْ کُمِیَا تِیَا     |
| کُوَا نْدِ سِیْمِیْ لَقْشْ  | کُمْکَا نِیْ مَوَانْ اُقْ   |
| جِرْبْ کُو مَوْرَقْ         | کُمِیْنِیْ نَا نَقْلِیَا    |
| مَوَا نَ سِیْمُوْتْ رِبْ    | وَالْ مَنُو سِیْمْکَابْ     |
| سِوْ کَامْ تِیْ رِبْ        | مَایُو اُ کَا زِ وِیَا      |
| کُوَا مَا یِوْنْ اُ کَالْ   | هَارِ شُو تَحْدَکْ حَالْ    |
| مَوَانْ کُمِیْ کَقْلْ       | اُ تَعَالُو تَارْ دِیَا     |
| مَوَا نَاءْ مِیَلِیْزْ      | یَاکْ نَدَانْ اُ کُو لِیْزْ |
| نَا وِوْ یَاکْ مَوِجْزْ     | نَ کُمُو نِیْ یَا نَدِیَا   |



|                          |                              |
|--------------------------|------------------------------|
| مَوَانَا مُنُو كُوْتِي   | هَيْت ياك اتاكي              |
| اِكِرْ نَعْلَك اَكُوْتِي | تار ري مَارَ دِيَا           |
| يَا مَبْ كُون مُهْمُ     | ن مَوَان كُكُ هَيْتِي        |
| هَآپْ تَاكُون هَامُ      | هَيْتِي كُكُ سِيَا           |
| ن هَيْتِي كُشِيَاَت      | كُوَا وَا ن كُفُوت           |
| نُ دِي سَاوَنَكِيَت      | نَمْن ياكُوَا سِيَا          |
| مَا پِر ن كُوشُومُ       | لِمَزَان ن رِيْمُ            |
| لِهَتَا ج مِسْمَا        | ن مَكُ كُشِيَا               |
| يُو مَا پِر ن قَان       | پَنِي تَانْدُ ن فُنُون       |
| ن مُپِر ن قَنَان         | كِيَاو هَهَتَا جِيَا         |
| كَلْ مَت سِنَاهُون       | وَسْفَار كِر وِر             |
| و نَغِن مَار هُون        | كُوَا كِيَت كُومَبْ نُ دِيَا |
| سِكَلْ مَك ن مَام        | مَام ن شَرِت كُوم            |
| كُوَا مَامَب يَالُوكَزَم | وَان كُوسِمَا مِيَا          |
| مِير يِيَاك مَك          | يَا ن كَار نَاسْمُبُوك       |
| مَار هُونَك رَتُونَك     | مَت آشُو تَار جِيَا          |

سَا سَ مَهْكَوْمَ پِيَوَانِ كَتَكَ هُنَّ اُنِّي

نِي زَفَنَغُ فُلَانِ نَ پِنْدَ كَمَا لِيَا

يَا نِ جَانْدَ لَا وَا لِ تَا لَ تَا مُبِي جَلَالِ

وَالُو نَ نَجْمَ عَمَلِ وَا نَ كُشْتَنُ كِيَا

نَا يِنِنَالُو لِيَلِ نِ وَا نَ تَوَ حُبَالِ

تَوَ تَوَا كُوَا مَوَلِ مَنُو حُفَرِ هَكِيَا

مَنْغُ اَكْتِي مَوَانِ سَمَكُو نَغُو وَا سَا نَ

تَسُو هُنَّ نُنْ مَوَانِ تَتَا مَشْكِيَا

تَسْفَنِي كِسْرَانِ اُنْشِي نَ ذُ حِرَانِ

نِ تَنُ يَا كِ مَانِ وَا تِ مَبُوَا كُفَرِحِيَا

شُكُوَا يَانْدَشْنُغُ نَ نِيُوِيُو تِلْ كِيُونُغُ

مَوَانِ تَا حُو تَرْنُغُ اُ تَرِرِ نَ اُ دِيَا

كِرْمَ تَفَرَحِكِ كُوَا وَا اُمَ نَ كُوَا وَا كِ

كُوَانِ وَا تِ تَكْمُوَلِكِ نِ تَنُ يَا كِ جَلِيَا

وَا نَ مَعَمِ تَزُو وَا زِ طَبِيَا نَجْمَ تَكُزِ

وَا نَ تَسُو نْدُ عَزِ رِ بَ مَنُو كُوَا تِيَا



موان كمي اهد سئند جهد

اتيمز كواكاسد ا و ن ممتند يا

موان ا كمزور اهد كتو سمر

ناو شير تا كتر و گات ا جارد يا

خير ا مؤامي كول يا ماب ا كنو كبال

مامب هون سقال ا م نغ هاشو ر و يا

موان متي كح كميند مول ر ب

هيو ن كو ا حب موان ا تا يو مؤا يا

متر و زن كصال عمل اسو شقيل

حكو هاشو كبال نالو كتو ئنجا

كو ا نغال ن موان صال نا هكون

تا يو ئلومعان هاشو وات ماز و يا

هاج زاك زيمز ما بين سمر و ر

موات ا رز و ر كم وات كشميا

مفند شان كوك ا حب كت كالك

اسو ميو كس مبد ا و ر عيا يا

كُو كِم اُتَامِيْ نَا سِ تَمِي كُو اِيُوِيْ

مُو اَمِيِي رِ تَبِ هَايْ مِيْل مِيْل تَا لُو كِيَا

نِ تَا لُو كِي اَحِبْ اُيُو هَابَ نِ هَابَ

مَا رَ هِيَا رَ كِيَا بَ سِ كِي هَسَا رِ دِيَا

هَفُنْدَ نِ اَحِرْمُ كُو اِوِ نَدُوَانِ اَدَمُ

خَا صِ وَالْوَوَاكِ دَمُ رُ حَمَ كُو اُنِيَا

سَمْفُنْدُ اُبَا خِلْ كَتُو لَوِ نِ مَالِ

نِ يِي اُبِرْ ذُلِ سِمْلِيْ كُزْ وِيَا

اُ شَجَاءَ مَرْوَرِ هِيُو طِيِيَا اَكُوَرِ

نِ مَنُو اَمَهْمِرِ ظَلَمَ كَتُو رِ دِيَا

اَسِرِ طَلَمَ كُو بِنُوَاكِ اُمَه

نِ وَ نِيُو نَغْ كِسَمَامَ اِوِ نِ يَاكِ طِيِيَا

نَسِيْبِ حَقِ يَاكِ نِ يَامَتُ نِ سِيَاكِ

نِ تَوَا اَكِلْ كُتَاكِ خَا وَ نَغْنِ كُو رَتِيَا

طِيِيَا يَا اُنِيْنَعَانِي هَكِي شَا هَا ثَفَانِي

اُ سِنِي سِمَا كَانِي تَوْتِ كِيُو كِيَا



مَكَانِي تَانُغُنْ مَوَانْ كَتْنِدْ مَكَانِي تَن  
ئِلْ كُسِدْ مَعَانْ سِينْدْ كُو نِينْغَانِيَا  
تَن مِييْ مَارْ وَزْ تَانُغْ اِلْ مَمِيرْ  
كِرْ تِنْدَرَنْجَمْ كَارْ جِمْ كُسِيدْ يَا  
مَفْنِدْ اَوْرَامَارْ شِي ۛ نِدْ كُو جَرْ  
كُتُو وَيَاكْ فِكِرْ اَوْرَامْ قُ كِرْ وَيَا  
مِييْ سَانْ مَارْ وَزْ يَا كَفْنِي ۛ وَمُوَزْ  
مُو نِيوْ اَسَاجِرْ وَ نَقَبْ كِتَقَمِيَا  
نْ مَرَارْ جَشَهْدْ حَرْفَقَامْ زِيدْ  
طَبِي زَا ۛ وَلَا دْ كَارْ تَا كِينْدَقِيَا  
سُو ۛ كُوَا كِتَامَلْ مَبَالْ مَبَالْ زَا ۛ خَالْ  
كُوَا حُوْنُكُو سَكَلْ كَدْ كِيَشْ طَبِيَا  
نْ اُ كُتُو يُو كُونْدْ نْ وَانْ وَتَا كُشِنْدْ  
اُ يَاكْ كُتْمَزِنْدْ نْ كُوَا مَا تُوَزْ كَلِيَا  
ۛ لِي زِيَادْ مَا ۛ كُوَا مَا مَبْ يَا كِنِيْمَبَانْ  
مَفَانْ ۛ خَا حَلْ شَانْ ۛ يُو مَتَا پِنْدْ لِيَا

|                          |                              |
|--------------------------|------------------------------|
| رُوبِي كُوشُورِ          | وَكُي لَا شَأْرُ             |
| هَلْ مَنُونَا زُرِ       | نَ هَمَّاسَ هُوَ تِيَا       |
| هُوبِ مَوَارِثُورِ       | نَ هِينُو فِكِرِ             |
| كُو نَاوُ كُلْ مَرِ      | شُورِ نَ تَوَ تِيَا          |
| وَاءِ وَ تِيِيَمِ        | وَ اُنْ وَانْ شَمَانِ        |
| لَكِيُونِ نَ دِنِ        | كُوَاءِ هَلِيتُو تُوَا كِيَا |
| رِ جَانِ وَايِ جِكْمِ    | هَلْ كُوَاءِ نَ مُمِ         |
| هُوَ فَنِي لُسُومِ       | شِيَا قِ هُنِي كِيَا         |
| كِرِبِ اَزْ تَنِي تَفَشِ | رَ عُمَرِ نَ وَكَاتِ         |
| اَلُو نَا نِيَاكِ كَشِ   | سِيكَاهَ مَتَا نَقْلِيَا     |
| كِرِبِ يَا كِفْدَكِ      | وَانْ نِينْدَ هُغْدَكِ       |
| جَهْدِ كُو يَلِكِ        | لُغْفُ اَحُو تَمِيلِيَا      |
| سِيو تَمِيلِي لُغْفُ     | نَنَا نَاءِ كُوَا وَ رَقِ    |
| هُوَ مَنُونِ وَ يَا قِ   | نَ غُرِرِ هُوَا نَقِيَا      |
| هَوَا نِيُونِ نَوَانِ    | بَلِ وَ مِتِمِ سَانِ         |
| نَ كَمِلِ هُنِيُونِ      | نَ وَتِ وَ مِتِيَا           |



وَأَنْ وَفَيْتَنِي سَاوُ أَصِلْ كُنُو بَاغُو  
وَأَنْ أَتَاوْتُوْمُو سَاوُ كُنُو وَائْتَدِيَا  
أَكُو يَنْدُو نَخْنِ كُوَا أَلِمِ أَسْنِي  
كُوَا زِ تَنْدُو بِيُونِ أَوْ أَ تَنْبِيَا  
هَلُو وَكَلِفَمُ تَا كُو مَبُورِ سَمُ  
أَمِيَا زَكْدُمُ هَارُ نَدَاكِ هَسَالِيَا  
نَ أَفَانِيَاءُ مَارُ مَنَزَرُ تَنَ ظَهَرِ  
أَتَنْدَاءُ تَقْصِيرِ مَوْلِي يَا كِ خَتِيَا  
مَوَانِ كَكُو سَا دَبُ كُمُرْدِنِ وَجِبُ  
لَكِنِ كُوَا تَرْتَبُ نَ كَمُو كَزِ يَانْدِيَا  
كَكُو سَمِ نَفْسِ أَرَكِي شِ أَسِي  
وَلِ سَوِ تَمَجِسِ كُو سَا كَمُ كَرِيَا  
سَمُوَا مَبِي كُلْ مَرِ زَا نَخْلِي زَا كِ سُوَرِ  
كُوَا نَ هَلُو هُمُ كَرِ أَسْعُوَانِ هُمُ شَا  
سَمُوَا مَبِي جَانِ جَزِ أَوْ هُوِيُو كَكُو جُونِ  
هَمُ شَرِ كُلْ هَزِ كُلْ مَارِ كِسِيَا

هَمَّتُو نَشْ جَرَه مَوِيُونِ هَاوَن رَاه

هَات كَام كَوَامَزَاه يِيپ هَاتُو فَرَهِيَا

كُن مَا كُوَسَا مَنَحْنِ ن مِمْبَامْب سِمَانِ

فُمْب مَا تُوَسِيُونِ ا فَنِي هُكْسِكِيَا

جَرَبُ كِيَكُوَسَا كُوَابَاذِ يَا مَا كُوَسَا

ن يَامَايزِ سِيَا سِي وَيُونِ هِيَتْمِيَا

هَائِ نَدِي كُوَمُونِ نَامْب كُونِ نِيُونِ

مُكِيُونِ يَسْعَوَانِ رَاذِ مَتَا نِيُولِيَا

هَكُونِ مَحْ كَمِلِ كَتُو كُوَسَا ن مَحَالِ

ن وَاكْمَبْ تَفْضِلِ نَانِي كُنْسِيَدِيَا

مَسَاد كُونِ نَتَاك مَوَزَاءُ كُوَنْدَاك

يَالِ مَتَايُو كُمْبِدْ نَانِي مَبِي كُونْدَلِيَا

ن مَكُوَمَ وَسَلَامُ اَلُوَا نْدَاك نَظْمُ

ن مَحْمُودُ اِسْمُ هُونِي كَتِ ن ذَرِيَا

ن مَا نْدَاك كُسِدْ اُنْشِدْ اُو زَوَرِ

كُوَابَاذِ يَانَعُ عِبُودِ مَا مَ اَلُوَا ن زَالِيَا

(يِيپ)



نَا مُتُّكَ أُتُنُّدَ عِبُودِكَ كَانَتْ كُنْدُ  
وَالْأَهْلُ مِنْ سَانِدِ بَابٍ فِي تَانَقْلِيَا  
تحت

2/3/201

1422/2/9

تَارِيخُ يَا كُنْدُ  
19/3/2015
